# Supplementary material
Source: HighWire-hosted journal article supplement (https://drc.bmj.com/content/10/6/e002948)
Supplement: inline-supplementary-material-6 [file inline-supplementary-material-6.pdf]

**Supplementary Table 3. Cell regulatory and immunological proteins differed between pregnant and non-pregnant patients as well as during and after pregnancy.** Peripheral venous blood from pregnant women with long-standing type 1 diabetes (L-T1D) was collected at three visits: first trimester (1T,  $n = 16$ ), third trimester (3T,  $n = 15$ ), and two months postpartum (2PP,  $n = 15$ ). For comparison, frozen plasma samples from non-pregnant women with L-T1D (NP,  $n = 30$ ) were used. A total of 184 analytes were measured by proximity extension assay. A two-sided unpaired Welch t-test was applied and adjusted for multiple testing (adjusted p-value) to compare protein levels between non-pregnant participants and both trimesters. A linear mixed effects model was used to assess longitudinal variations in the proteome of pregnant women. The model found that 79 analytes in total had changed between visits. The Benjamini-Hochberg method was then applied to correct for multiple testing across all proteins and fixed effects (false discovery rate, q-value).

| <b>Welch t-test</b>       |                                                        |                        |
|---------------------------|--------------------------------------------------------|------------------------|
| <b>Comparison</b>         | <b>Significant (adjusted <math>p &lt; 0.05</math>)</b> | <b>Non-significant</b> |
| 1T vs NP                  | 16                                                     | 168                    |
| 3T vs NP                  | 47                                                     | 137                    |
| <b>Linear mixed model</b> |                                                        |                        |
| <b>Comparison</b>         | <b>Significant (<math>q &lt; 0.05</math>)</b>          | <b>Non-significant</b> |
| 1T vs 3T                  | 47                                                     | 32                     |
| 1T vs 2PP                 | 50                                                     | 29                     |
| 3T vs 2PP                 | 63                                                     | 16                     |

| Test                    | Comparison | UniProt  | Short name | Adjusted p-value |
|-------------------------|------------|----------|------------|------------------|
| Welch Two Sample t-test | 1T vs NP   | P58294   | PROK1      | 1,50E-09         |
|                         |            | Q9UKX5   | ITGA11     | 2,22E-06         |
|                         |            | O43699   | SIGLEC6    | 6,41E-06         |
|                         |            | P08727   | KRT19      | 1,09E-05         |
|                         |            | Q9NP99   | TREM1      | 6,67E-05         |
|                         |            | P51671   | CCL11      | 1,30E-04         |
|                         |            | O75054   | IGSF3      | 4,20E-04         |
|                         |            | Q86SJ2   | AMIGO2     | 4,20E-04         |
|                         |            | Q86WV1   | SKAP1      | 6,32E-04         |
|                         |            | O43186   | CRX        | 9,21E-04         |
|                         |            | Q9NSA1   | FGF-21     | 9,56E-04         |
|                         |            | O14917   | PCDH17     | 1,79E-03         |
|                         |            | Q6UXK5   | LRRN1      | 2,88E-03         |
|                         |            | Q07065   | CKAP4      | 2,93E-03         |
|                         |            | Q9Y3P8   | SIT1       | 3,34E-02         |
| P15514                  | AREG       | 4,73E-02 |            |                  |
| Welch Two Sample t-test | 3T vs NP   | O43699   | SIGLEC6    | 2,63E-15         |
|                         |            | O75054   | IGSF3      | 2,63E-15         |
|                         |            | Q9UKX5   | ITGA11     | 3,59E-11         |
|                         |            | Q07065   | CKAP4      | 6,86E-09         |
|                         |            | Q9NP99   | TREM1      | 1,37E-07         |
|                         |            | P08727   | KRT19      | 1,38E-07         |
|                         |            | P58294   | PROK1      | 1,38E-07         |
|                         |            | P51671   | CCL11      | 3,65E-07         |
|                         |            | P15514   | AREG       | 1,19E-05         |
|                         |            | Q6UXK5   | LRRN1      | 1,44E-05         |
|                         |            | O00220   | TNFRSF10A  | 1,11E-04         |
|                         |            | Q6UXB4   | CLEC4G     | 3,24E-04         |
|                         |            | P21810   | BGN        | 3,91E-04         |
|                         |            | Q96PQ0   | SORCS2     | 4,35E-04         |
|                         |            | Q8TD06   | AGR3       | 6,92E-04         |
|                         |            | Q9Y3P8   | SIT1       | 8,39E-04         |
|                         |            | Q8WTT0   | CLEC4C     | 1,06E-03         |
|                         |            | Q9UMR7   | CLEC4A     | 1,15E-03         |
|                         |            | O75354   | ENTPD6     | 2,05E-03         |
|                         |            | Q8WXI8   | CLEC4D     | 2,39E-03         |
|                         |            | O43186   | CRX        | 2,82E-03         |
|                         |            | Q86WV1   | SKAP1      | 2,82E-03         |
|                         |            | P02462   | COL4A1     | 3,01E-03         |
|                         |            | Q86SJ2   | AMIGO2     | 3,01E-03         |
|                         |            | O43915   | VEGFD      | 4,73E-03         |
|                         |            | Q96SM3   | CPXM1      | 6,23E-03         |
|                         |            | P16278   | GLB1       | 6,58E-03         |
|                         |            | P48740   | MASP1      | 6,58E-03         |

|                           |                 |               |             |                 |
|---------------------------|-----------------|---------------|-------------|-----------------|
|                           |                 | O60243        | HS6ST1      | 6,92E-03        |
|                           |                 | P28845        | HSD11B1     | 6,92E-03        |
|                           |                 | P78310        | CXADR       | 8,47E-03        |
|                           |                 | P58499        | FAM3B       | 8,58E-03        |
|                           |                 | Q06520        | SULT2A1     | 1,18E-02        |
|                           |                 | Q9Y662        | HS3ST3B1    | 1,18E-02        |
|                           |                 | O60449        | LY75        | 1,49E-02        |
|                           |                 | Q9BQT9        | CLSTN3      | 1,78E-02        |
|                           |                 | Q96PD2        | DCBLD2      | 1,94E-02        |
|                           |                 | O95988        | TCL1B       | 2,11E-02        |
|                           |                 | P34130        | NTF4        | 3,31E-02        |
|                           |                 | P05231        | IL6         | 3,45E-02        |
|                           |                 | Q9BXN2        | CLEC7A      | 3,49E-02        |
|                           |                 | Q6EIG7        | CLEC6A      | 3,70E-02        |
|                           |                 | Q9NRM6        | IL17RB      | 3,70E-02        |
|                           |                 | P47929        | LGALS7      | 3,70E-02        |
|                           |                 | P15848        | ARSB        | 4,30E-02        |
|                           |                 | Q92982        | NINJ1       | 4,33E-02        |
|                           |                 | P01275        | GCG         | 4,89E-02        |
| <b>Linear mixed model</b> | <b>1T vs 3T</b> | <b>Q8TD06</b> | <b>AGR3</b> | <b>9,18E-06</b> |
|                           |                 | P15514        | AREG        | 2,88E-02        |
|                           |                 | P21810        | BGN         | 1,07E-05        |
|                           |                 | Q9BWV1        | BOC         | 1,70E-02        |
|                           |                 | P10747        | CD28        | 3,22E-02        |
|                           |                 | Q07065        | CKAP4       | 4,21E-10        |
|                           |                 | Q9UMR7        | CLEC4A      | 1,38E-08        |
|                           |                 | Q8WTT0        | CLEC4C      | 4,85E-03        |
|                           |                 | Q6UXB4        | CLEC4G      | 4,60E-06        |
|                           |                 | Q6EIG7        | CLEC6A      | 1,33E-02        |
|                           |                 | Q9BXN2        | CLEC7A      | 2,45E-07        |
|                           |                 | P78310        | CXADR       | 4,58E-05        |
|                           |                 | Q96PD2        | DCBLD2      | 1,56E-03        |
|                           |                 | O75354        | ENTPD6      | 2,69E-05        |
|                           |                 | P58499        | FAM3B       | 3,26E-05        |
|                           |                 | Q9NSA1        | FGF-21      | 6,81E-10        |
|                           |                 | Q10471        | GALNT2      | 1,04E-06        |
|                           |                 | P01275        | GCG         | 2,18E-02        |
|                           |                 | Q02742        | GCNT1       | 1,54E-03        |
|                           |                 | P01242        | GH2         | 4,00E-03        |
|                           |                 | P16278        | GLB1        | 3,08E-04        |
|                           |                 | Q9Y662        | HS3ST3B1    | 6,43E-03        |
|                           |                 | O60243        | HS6ST1      | 2,27E-05        |
|                           |                 | O75054        | IGSF3       | 2,41E-14        |
|                           |                 | Q9NRM6        | IL17RB      | 2,32E-04        |
|                           |                 | P05231        | IL6         | 4,41E-03        |
| Q9UKX5                    | ITGA11          | 2,21E-04      |             |                 |

|                           |                  |        |           |          |
|---------------------------|------------------|--------|-----------|----------|
|                           |                  | P18564 | ITGB6     | 2,53E-04 |
|                           |                  | Q96182 | KAZALD1   | 7,04E-04 |
|                           |                  | Q13241 | KLRD1     | 1,89E-03 |
|                           |                  | P08727 | KRT19     | 1,66E-04 |
|                           |                  | Q9UQV4 | LAMP3     | 2,72E-02 |
|                           |                  | Q6UXK5 | LRRN1     | 4,10E-04 |
|                           |                  | Q8N2G4 | LYPD1     | 4,32E-03 |
|                           |                  | Q12968 | NFATC3    | 1,76E-02 |
|                           |                  | P34130 | NTF4      | 1,34E-02 |
|                           |                  | O14917 | PCDH17    | 1,15E-02 |
|                           |                  | P58294 | PROK1     | 4,45E-02 |
|                           |                  | Q9C0C4 | SEMA4C    | 2,31E-03 |
|                           |                  | Q96LC7 | SIGLEC10  | 1,21E-02 |
|                           |                  | O43699 | SIGLEC6   | 0,00E+00 |
|                           |                  | Q96PQ0 | SORCS2    | 1,33E-06 |
|                           |                  | Q06520 | SULT2A1   | 1,49E-04 |
|                           |                  | P09758 | TACSTD2   | 7,55E-03 |
|                           |                  | O00220 | TNFRSF10A | 2,58E-08 |
|                           |                  | Q9NP99 | TREM1     | 6,41E-05 |
|                           |                  | O43915 | VEGFD     | 1,32E-03 |
| <b>Linear mixed model</b> | <b>1T vs 2PP</b> | Q8TD06 | AGR3      | 3,27E-02 |
|                           |                  | Q86S2  | AMIGO2    | 3,18E-04 |
|                           |                  | P15514 | AREG      | 6,38E-06 |
|                           |                  | Q9BWV1 | BOC       | 3,10E-06 |
|                           |                  | P78410 | BTN3A2    | 1,11E-02 |
|                           |                  | P51671 | CCL11     | 4,30E-06 |
|                           |                  | P10747 | CD28      | 8,63E-03 |
|                           |                  | Q01151 | CD83      | 3,53E-04 |
|                           |                  | Q49AH0 | CDNF      | 3,80E-03 |
|                           |                  | Q15517 | CDSN      | 1,20E-02 |
|                           |                  | Q8WTT0 | CLEC4C    | 4,73E-03 |
|                           |                  | Q9BXN2 | CLEC7A    | 3,24E-03 |
|                           |                  | Q9BQT9 | CLSTN3    | 9,05E-07 |
|                           |                  | Q8N608 | DPP10     | 2,58E-03 |
|                           |                  | Q7Z5A7 | FAM19A5   | 2,11E-05 |
|                           |                  | P58499 | FAM3B     | 1,20E-02 |
|                           |                  | Q96P31 | FCRL3     | 1,69E-04 |
|                           |                  | Q9NSA1 | FGF-21    | 1,91E-07 |
|                           |                  | Q10471 | GALNT2    | 1,31E-02 |
|                           |                  | Q02742 | GCNT1     | 7,69E-04 |
|                           |                  | A4D1B5 | GSAP      | 4,86E-04 |
|                           |                  | P28845 | HSD11B1   | 7,86E-03 |
|                           |                  | Q8IU57 | IFNLR1    | 3,55E-05 |
|                           |                  | O75054 | IGSF3     | 1,04E-03 |
|                           |                  | P42701 | IL12RB1   | 5,54E-03 |
|                           |                  | Q9UKX5 | ITGA11    | 5,13E-08 |

|                    |           |        |          |          |
|--------------------|-----------|--------|----------|----------|
|                    |           | P18564 | ITGB6    | 3,88E-05 |
|                    |           | Q96182 | KAZALD1  | 4,35E-02 |
|                    |           | Q13241 | KLRD1    | 8,75E-05 |
|                    |           | P08727 | KRT19    | 4,66E-06 |
|                    |           | P18627 | LAG3     | 5,86E-05 |
|                    |           | Q6UXK5 | LRRN1    | 6,85E-14 |
|                    |           | O60449 | LY75     | 5,94E-07 |
|                    |           | Q9NX58 | LYAR     | 2,67E-05 |
|                    |           | Q8N2G4 | LYPD1    | 6,68E-03 |
|                    |           | Q7Z6M3 | MILR1    | 3,89E-06 |
|                    |           | Q16653 | MOG      | 1,53E-05 |
|                    |           | Q9UBG0 | MRC2     | 1,94E-06 |
|                    |           | O14917 | PCDH17   | 5,89E-03 |
|                    |           | P58294 | PROK1    | 3,66E-15 |
|                    |           | O60880 | SH2D1A   | 4,70E-03 |
|                    |           | Q96LC7 | SIGLEC10 | 1,72E-02 |
|                    |           | O43699 | SIGLEC6  | 5,65E-10 |
|                    |           | Q9Y3P8 | SIT1     | 1,10E-04 |
|                    |           | Q86WV1 | SKAP1    | 3,70E-07 |
|                    |           | Q96PQ0 | SORCS2   | 4,02E-02 |
|                    |           | P09758 | TACSTD2  | 5,67E-04 |
|                    |           | Q15661 | TPSAB1   | 2,68E-03 |
|                    |           | Q9NP99 | TREM1    | 1,17E-03 |
|                    |           | O43915 | VEGFD    | 2,18E-03 |
| Linear mixed model | 3T vs 2PP | Q8TD06 | AGR3     | 1,08E-02 |
|                    |           | Q86SJ2 | AMIGO2   | 6,34E-04 |
|                    |           | P15514 | AREG     | 5,94E-09 |
|                    |           | P21810 | BGN      | 3,92E-03 |
|                    |           | Q9BWW1 | BOC      | 9,15E-03 |
|                    |           | P51671 | CCL11    | 4,03E-08 |
|                    |           | P10747 | CD28     | 5,93E-06 |
|                    |           | Q01151 | CD83     | 2,62E-05 |
|                    |           | Q49AH0 | CDNF     | 1,50E-04 |
|                    |           | Q15517 | CDSN     | 2,75E-04 |
|                    |           | P0CG37 | CFC1     | 1,56E-02 |
|                    |           | Q07065 | CKAP4    | 1,38E-11 |
|                    |           | Q9UMR7 | CLEC4A   | 3,52E-06 |
|                    |           | Q8WTT0 | CLEC4C   | 3,90E-07 |
|                    |           | Q6UXB4 | CLEC4G   | 3,84E-06 |
|                    |           | Q6EIG7 | CLEC6A   | 2,51E-02 |
|                    |           | Q9BXN2 | CLEC7A   | 5,34E-03 |
|                    |           | Q9BQT9 | CLSTN3   | 4,74E-06 |
|                    |           | P16562 | CRISP2   | 8,25E-03 |
|                    |           | O43186 | CRX      | 2,92E-02 |
|                    |           | P78310 | CXADR    | 2,27E-03 |
|                    |           | Q8N608 | DPP10    | 2,12E-03 |

|  |  |        |           |          |
|--|--|--------|-----------|----------|
|  |  | Q9UNE0 | EDAR      | 3,38E-03 |
|  |  | O75354 | ENTPD6    | 1,96E-03 |
|  |  | Q7Z5A7 | FAM19A5   | 8,86E-06 |
|  |  | Q96P31 | FCRL3     | 2,24E-06 |
|  |  | Q9NSA1 | FGF-21    | 4,51E-02 |
|  |  | Q10471 | GALNT2    | 3,22E-03 |
|  |  | P01275 | GCG       | 4,57E-02 |
|  |  | P01242 | GH2       | 7,82E-04 |
|  |  | P16278 | GLB1      | 2,32E-04 |
|  |  | A4D1B5 | GSAP      | 1,16E-02 |
|  |  | Q9Y662 | HS3ST3B1  | 6,51E-05 |
|  |  | O60243 | HS6ST1    | 4,69E-05 |
|  |  | P28845 | HSD11B1   | 1,68E-05 |
|  |  | Q8IU57 | IFNLR1    | 6,25E-07 |
|  |  | O75054 | IGSF3     | 0,00E+00 |
|  |  | Q9NRM6 | IL17RB    | 1,83E-04 |
|  |  | Q9UKX5 | ITGA11    | 1,90E-12 |
|  |  | P08727 | KRT19     | 3,91E-11 |
|  |  | P18627 | LAG3      | 1,47E-02 |
|  |  | Q9UQV4 | LAMP3     | 1,30E-03 |
|  |  | Q6UXK5 | LRRN1     | 0,00E+00 |
|  |  | O60449 | LY75      | 8,85E-09 |
|  |  | Q9NX58 | LYAR      | 3,82E-04 |
|  |  | Q6UB28 | METAP1D   | 4,73E-03 |
|  |  | Q7Z6M3 | MILR1     | 5,05E-07 |
|  |  | Q16653 | MOG       | 1,70E-05 |
|  |  | Q9UBG0 | MRC2      | 1,05E-04 |
|  |  | P58294 | PROK1     | 0,00E+00 |
|  |  | O75475 | PSIP1     | 9,31E-03 |
|  |  | Q03431 | PTH1R     | 2,39E-04 |
|  |  | O60880 | SH2D1A    | 1,48E-03 |
|  |  | O43699 | SIGLEC6   | 9,99E-15 |
|  |  | Q9Y3P8 | SIT1      | 8,25E-07 |
|  |  | Q86WV1 | SKAP1     | 3,12E-06 |
|  |  | Q96PQ0 | SORCS2    | 9,37E-04 |
|  |  | Q06520 | SULT2A1   | 4,86E-02 |
|  |  | O00220 | TNFRSF10A | 2,35E-06 |
|  |  | Q15661 | TPSAB1    | 1,50E-03 |
|  |  | Q9NP99 | TREM1     | 1,79E-09 |
|  |  | O43915 | VEGFD     | 7,01E-08 |
|  |  | O14904 | WNT9A     | 1,09E-02 |
